# Supplementary material for: Dynamics of the Burlan and Pomacochas Lakes Using SAR Data in GEE, Machine Learning Classifiers, and Regression Methods
Source: MDPI journal article supplement (doi:10.3390/ijgi11110534), 2022-10-24
Supplement: s1 [file s1]

Table S2. Coefficient of determination calculated for each combination of data according to the five regression methods used.

| Burlan Lake               |       |        |      |        |       |        |       |        |       |        |      | Pomacochas Lake |         |        |       |        |        |        |        |        |        |        |       |        |
|---------------------------|-------|--------|------|--------|-------|--------|-------|--------|-------|--------|------|-----------------|---------|--------|-------|--------|--------|--------|--------|--------|--------|--------|-------|--------|
| Simple Linear Regression  |       |        |      |        |       |        |       |        |       |        |      |                 |         |        |       |        |        |        |        |        |        |        |       |        |
| CART                      |       |        |      | RF     |       |        |       | SVM    |       |        |      | CART            |         |        |       | RF     |        |        |        | SVM    |        |        |       |        |
| A                         | r2    | P      | r2   | A      | r2    | P      | r2    | A      | r2    | P      | r2   | A               | r2      | P      | r2    | A      | r2     | P      | r2     | A      | r2     | P      | r2    |        |
| AVH                       | 42.01 | -0.014 | 3.42 | 0.0507 | 41.97 | 0.017  | 3.411 | -0.156 | 41.79 | -0.012 | 3.43 | 0.15            | 427.741 | -0.161 | 14.86 | -0.028 | 428.58 | -0.07  | 14.906 | 0.018  | 421.89 | -0.048 | 13.64 | -0.24  |
| AVV                       | 43.13 | 0.0299 | 3.58 | 0.0286 | 43.12 | 0.0408 | 3.54  | -0.071 | 42.48 | -0.058 | 3.51 | -0.095          | 437.895 | -0.034 | 17.04 | 0.0438 | 436.68 | -0.018 | 17.669 | -0.056 | 433.42 | -0.009 | 17.48 | 0.084  |
| DVH                       | 42.58 | -0.002 | 3.47 | 0.13   | 42.86 | 0.0445 | 3.471 | -0.085 | 42.46 | 0.12   | 3.48 | 0.114           | 418.932 | -0.049 | 11.31 | 0.0055 | 419.42 | -0.016 | 11.381 | 0.0158 | 417.78 | -0.004 | 11.53 | -0.134 |
| DVV                       | 43.99 | -0.013 | 3.88 | -0.107 | 43.75 | -0.13  | 3.811 | -0.061 | 44.49 | -0.005 | 3.89 | -0.005          | 432.945 | -0.219 | 13.28 | 0.0949 | 431.88 | -0.126 | 13.07  | -0.016 | 438.02 | -0.294 | 14.37 | -0.017 |
| Polinomial Regression     |       |        |      |        |       |        |       |        |       |        |      |                 |         |        |       |        |        |        |        |        |        |        |       |        |
| CART                      |       |        |      | RF     |       |        |       | SVM    |       |        |      | CART            |         |        |       | RF     |        |        |        | SVM    |        |        |       |        |
| A                         | r2    | P      | r2   | A      | r2    | P      | r2    | A      | r2    | P      | r2   | A               | r2      | P      | r2    | A      | r2     | P      | r2     | A      | r2     | P      | r2    |        |
| AVH                       | 41.61 | 0.0288 | 3.39 | 0.09   | 41.59 | 0.048  | 3.389 | -0.076 | 41.56 | -0.064 | 3.41 | 0.2             | 428.4   | -0.076 | 15.28 | -0.062 | 428.82 | -0.029 | 15.484 | 0.0322 | 410.53 | 0.129  | 12.73 | 0.117  |
| AVV                       | 42.88 | 0.055  | 3.52 | 0.0855 | 43.05 | 0.076  | 3.53  | -0.001 | 42.66 | 0.031  | 3.49 | -0.006          | 435.007 | 0.069  | 16.83 | 0.18   | 435.13 | 0.086  | 16.862 | 0.0604 | 427.66 | 0.2108 | 16.54 | 0.242  |
| DVH                       | 42.24 | 0.0122 | 3.41 | 0.1855 | 42.62 | 0.046  | 3.414 | 0.0844 | 42.32 | 0.1506 | 3.44 | 0.166           | 418.724 | 0.0435 | 11.33 | 0.019  | 419.8  | -0.082 | 11.368 | 0.019  | 407.83 | 0.3766 | 11.03 | 0.133  |
| DVV                       | 44.23 | 0.0285 | 3.78 | -0.061 | 43.93 | -0.043 | 3.772 | 0.0021 | 44.22 | 0.0186 | 3.75 | -0.008          | 432.602 | -0.054 | 13.13 | -0.036 | 431.8  | -0.059 | 13.038 | -0.007 | 438.66 | -0.111 | 14.4  | 0.0015 |
| Support Vector Regression |       |        |      |        |       |        |       |        |       |        |      |                 |         |        |       |        |        |        |        |        |        |        |       |        |
| CART                      |       |        |      | RF     |       |        |       | SVM    |       |        |      | CART            |         |        |       | RF     |        |        |        | SVM    |        |        |       |        |
| A                         | r2    | P      | r2   | A      | r2    | P      | r2    | A      | r2    | P      | r2   | A               | r2      | P      | r2    | A      | r2     | P      | r2     | A      | r2     | P      | r2    |        |
| AVH                       | 41.71 | -0.056 | 3.39 | -0.41  | 41.7  | -0.075 | 3.39  | -0.534 | 41.22 | 0.067  | 3.44 | 0.121           | 430.35  | -0.441 | 15.2  | 0.152  | 428.09 | -0.196 | 15.14  | 0.42   | 415    | -0.006 | 13.25 | -0.025 |
| AVV                       | 42.96 | 0.024  | 3.48 | 0.056  | 43.01 | -0.071 | 3.47  | -0.252 | 42.5  | -0.176 | 3.43 | 0.009           | 434.84  | -0.064 | 16.86 | 0.016  | 436.15 | -0.096 | 16.86  | -0.042 | 424.72 | -0.03  | 16.21 | 0.046  |
| DVH                       | 42.26 | -0.23  | 3.42 | 0.106  | 42.69 | -0.178 | 3.44  | 0.247  | 42.43 | 0.216  | 3.41 | 0.29            | 419.64  | -0.092 | 11.42 | -0.404 | 419.9  | -0.276 | 11.42  | -0.189 | 411.42 | 0.41   | 11.15 | 0.12   |
| DVV                       | 44.59 | -0.134 | 3.69 | 0.05   | 44.39 | -0.149 | 3.68  | -0.165 | 44.03 | -0.027 | 3.69 | -0.051          | 432.74  | -0.234 | 13.12 | -0.103 | 432.48 | -0.119 | 13.14  | 0.002  | 438.9  | -0.191 | 15.16 | -0.208 |
| Decision Trees Regression |       |        |      |        |       |        |       |        |       |        |      |                 |         |        |       |        |        |        |        |        |        |        |       |        |
| CART                      |       |        |      | RF     |       |        |       | SVM    |       |        |      | CART            |         |        |       | RF     |        |        |        | SVM    |        |        |       |        |
| A                         | r2    | P      | r2   | A      | r2    | P      | r2    | A      | r2    | P      | r2   | A               | r2      | P      | r2    | A      | r2     | P      | r2     | A      | r2     | P      | r2    |        |
| AVH                       | 41.6  | -0.08  | 3.4  | -0.721 | 41.6  | -0.492 | 3.4   | -0.849 | 43.94 | -0.21  | 3.5  | -0.658          | 434.62  | -1.208 | 14.81 | -0.496 | 426.01 | -1.136 | 14.81  | -0.203 | 421.1  | -1.28  | 12.26 | -1.716 |
| AVV                       | 45.17 | 0.371  | 3.66 | 0.061  | 45.17 | -0.167 | 4.03  | -0.533 | 44.74 | -1.16  | 3.35 | -0.983          | 435.02  | -1.201 | 17.1  | 0.158  | 434.57 | -0.711 | 16.9   | -0.193 | 420.3  | -0.44  | 13.74 | -0.861 |
| DVH                       | 44    | -0.633 | 3.44 | -0.176 | 42.65 | -0.309 | 3.46  | -0.377 | 44.01 | -1.148 | 3.5  | -0.261          | 415.74  | -0.731 | 11.4  | -0.834 | 420.12 | -2.311 | 11.4   | -0.738 | 414.45 | -0.22  | 11.19 | -0.535 |
| DVV                       | 45.69 | -0.274 | 3.43 | 0.234  | 45.69 | -0.209 | 3.43  | -0.379 | 45.97 | -0.503 | 3.39 | -0.581          | 430.07  | -0.966 | 12.97 | -0.859 | 430.07 | -0.618 | 12.97  | -0.73  | 442.56 | -0.464 | 15.27 | -1.04  |
| Random Forest Regression  |       |        |      |        |       |        |       |        |       |        |      |                 |         |        |       |        |        |        |        |        |        |        |       |        |
| CART                      |       |        |      | RF     |       |        |       | SVM    |       |        |      | CART            |         |        |       | RF     |        |        |        | SVM    |        |        |       |        |
| A                         | r2    | P      | r2   | A      | r2    | P      | r2    | A      | r2    | P      | r2   | A               | r2      | P      | r2    | A      | r2     | P      | r2     | A      | r2     | P      | r2    |        |
| AVH                       | 41.64 | 0.242  | 3.39 | -0.359 | 41.56 | -0.033 | 3.39  | -0.518 | 42.38 | -0.048 | 3.48 | -0.405          | 423.76  | -0.782 | 15.15 | -0.409 | 427.8  | -0.565 | 15.1   | 0.0099 | 415.3  | -0.622 | 13.21 | -0.954 |
| AVV                       | 44.47 | 0.46   | 3.69 | 0.146  | 44.7  | 0.167  | 3.86  | -0.158 | 43.13 | -0.524 | 3.37 | -0.568          | 435.25  | -0.665 | 17.46 | 0.261  | 435.2  | -0.403 | 17.51  | -0.131 | 425.67 | 0.0407 | 14.28 | -0.561 |
| DVH                       | 42.55 | -0.341 | 3.46 | 0.164  | 42.54 | -0.139 | 3.44  | -0.135 | 42.5  | -0.519 | 3.49 | 0.066           | 418.43  | -0.099 | 11.25 | -0.243 | 420.3  | -1.041 | 11.44  | -0.106 | 413.14 | 0.147  | 11.24 | 0.0038 |
| DVV                       | 44.74 | 0.226  | 3.82 | 0.43   | 44.52 | -0.073 | 3.53  | -0.253 | 45.57 | -0.59  | 3.87 | -0.268          | 433.03  | -0.651 | 12.9  | -0.665 | 431.98 | -0.654 | 13.73  | -0.468 | 440.45 | -0.293 | 15.06 | -0.455 |
