# Supplementary material for: Dynamics of the Burlan and Pomacochas Lakes Using SAR Data in GEE, Machine Learning Classifiers, and Regression Methods
Source: MDPI journal article supplement (doi:10.3390/ijgi11110534), 2022-10-24
Supplement: s1 [file s1]

**Table S1:** Sentinel-1 imagery used for Lakes Burlan and Pomacochas

| N° | Combination | ID                                                                                    | Combination | ID                                                                                    |
|----|-------------|---------------------------------------------------------------------------------------|-------------|---------------------------------------------------------------------------------------|
| 1  | AVV         | COPERNICUS/S1_GRD/S1A_IW_GRDH_1SSV_20141006T233519_20141006T233544_002715_0030A6_08CA | DVH         | COPERNICUS/S1_GRD/S1A_IW_GRDH_1SSV_20141015T105346_20141015T105411_002839_00333E_F9B0 |
| 2  |             | COPERNICUS/S1_GRD/S1A_IW_GRDH_1SSV_20141217T233518_20141217T233543_003765_0047E2_74FB |             | COPERNICUS/S1_GRD/S1A_IW_GRDH_1SSV_20141202T105345_20141202T105410_003539_0042AA_023D |
| 3  |             | COPERNICUS/S1_GRD/S1A_IW_GRDH_1SSV_20150110T233517_20150110T233542_004115_004FC8_8765 |             | COPERNICUS/S1_GRD/S1A_IW_GRDH_1SSV_20141226T105344_20141226T105409_003889_004AA0_03E2 |
| 4  |             | COPERNICUS/S1_GRD/S1A_IW_GRDH_1SSV_20150203T233516_20150203T233541_004465_005799_0541 |             | COPERNICUS/S1_GRD/S1A_IW_GRDH_1SSV_20150119T105344_20150119T105409_004239_00527E_9E0A |
| 5  |             | COPERNICUS/S1_GRD/S1A_IW_GRDH_1SSV_20150311T233516_20150311T233541_004990_00640A_E0C2 |             | COPERNICUS/S1_GRD/S1A_IW_GRDH_1SSV_20150212T105343_20150212T105408_004589_005A5F_EA92 |
| 6  |             | COPERNICUS/S1_GRD/S1A_IW_GRDH_1SSV_20150428T233518_20150428T233543_005690_0074D8_3D96 |             | COPERNICUS/S1_GRD/S1A_IW_GRDH_1SSV_20150308T105343_20150308T105408_004939_0062C3_60ED |
| 7  |             | COPERNICUS/S1_GRD/S1A_IW_GRDH_1SSV_20151106T233536_20151106T233601_008490_00C032_DE03 |             | COPERNICUS/S1_GRD/S1A_IW_GRDH_1SSV_20150401T105344_20150401T105409_005289_006B0A_F468 |
| 8  |             | COPERNICUS/S1_GRD/S1A_IW_GRDH_1SSV_20151130T233530_20151130T233555_008840_00CA04_E935 |             | COPERNICUS/S1_GRD/S1A_IW_GRDH_1SSV_20150425T105345_20150425T105410_005639_00739F_A071 |
| 9  |             | COPERNICUS/S1_GRD/S1A_IW_GRDH_1SSV_20151224T233529_20151224T233554_009190_00D3DA_498A |             | COPERNICUS/S1_GRD/S1A_IW_GRDH_1SSV_20150612T105348_20150612T105413_006339_00856A_96E8 |
| 10 |             | COPERNICUS/S1_GRD/S1A_IW_GRDH_1SSV_20160117T233528_20160117T233553_009540_00DDD3_D47B |             | COPERNICUS/S1_GRD/S1A_IW_GRDH_1SSV_20150706T105354_20150706T105419_006689_008F1A_0D53 |
| 11 |             | COPERNICUS/S1_GRD/S1A_IW_GRDH_1SSV_20160210T233524_20160210T233549_009890_00E805_38F9 |             | COPERNICUS/S1_GRD/S1A_IW_GRDH_1SSV_20150730T105355_20150730T105420_007039_009916_81EA |
| 12 |             | COPERNICUS/S1_GRD/S1A_IW_GRDH_1SSV_20160305T233528_20160305T233553_010240_00F21B_BA82 |             | COPERNICUS/S1_GRD/S1A_IW_GRDH_1SSV_20150823T105357_20150823T105422_007389_00A298_35F8 |
| 13 |             | COPERNICUS/S1_GRD/S1A_IW_GRDH_1SSV_20160329T233528_20160329T233553_010590_00FC19_3691 |             | COPERNICUS/S1_GRD/S1A_IW_GRDH_1SSV_20150916T105357_20150916T105422_007739_00AC10_90D9 |
| 14 |             | COPERNICUS/S1_GRD/S1A_IW_GRDH_1SSV_20160422T233529_20160422T233554_010940_010698_25CA |             | COPERNICUS/S1_GRD/S1A_IW_GRDH_1SSV_20151010T105358_20151010T105423_008089_00B570_177A |
| 15 |             | COPERNICUS/S1_GRD/S1A_IW_GRDH_1SSV_20160516T233533_20160516T233558_011290_0111BB_A027 |             | COPERNICUS/S1_GRD/S1A_IW_GRDH_1SSV_20151103T105358_20151103T105423_008439_00BED8_2F98 |
| 16 |             | COPERNICUS/S1_GRD/S1A_IW_GRDH_1SSV_20160609T233535_20160609T233600_011640_011CF5_4C82 |             | COPERNICUS/S1_GRD/S1A_IW_GRDH_1SSV_20151127T105352_20151127T105417_008789_00C88B_F31B |
| 17 |             | COPERNICUS/S1_GRD/S1A_IW_GRDH_1SSV_20160703T233536_20160703T233601_011990_01280C_A90E |             | COPERNICUS/S1_GRD/S1A_IW_GRDH_1SSV_20151221T105351_20151221T105416_009139_00D25A_00F7 |
| 18 |             | COPERNICUS/S1_GRD/S1A_IW_GRDH_1SSV_20160727T233537_20160727T233602_012340_01337D_D827 |             | COPERNICUS/S1_GRD/S1A_IW_GRDH_1SSV_20160114T105350_20160114T105415_009489_00DC55_B6E6 |
| 19 |             | COPERNICUS/S1_GRD/S1A_IW_GRDH_1SSV_20160820T233539_20160820T233604_012690_013F1F_8000 |             | COPERNICUS/S1_GRD/S1A_IW_GRDH_1SDV_20160207T105350_20160207T105415_009839_00E67F_FE71 |
| 20 |             | COPERNICUS/S1_GRD/S1A_IW_GRDH_1SSV_20160913T233540_20160913T233605_013040_014AA3_29BF |             | COPERNICUS/S1_GRD/S1A_IW_GRDH_1SSV_20160302T105350_20160302T105415_010189_00F09A_52F7 |
| 21 |             | COPERNICUS/S1_GRD/S1B_IW_GRDH_1SSV_20161013T233452_20161013T233517_002494_004357_2523 |             | COPERNICUS/S1_GRD/S1A_IW_GRDH_1SSV_20160326T105350_20160326T105415_010539_00FA8F_AB3F |
| 22 |             | COPERNICUS/S1_GRD/S1B_IW_GRDH_1SSV_20161106T233452_20161106T233517_002844_004D16_42C0 |             | COPERNICUS/S1_GRD/S1A_IW_GRDH_1SSV_20160419T105351_20160419T105416_010889_0104F9_EAD6 |
| 23 |             | COPERNICUS/S1_GRD/S1B_IW_GRDH_1SSV_20161130T233451_20161130T233516_003194_0056FC_8CBB |             | COPERNICUS/S1_GRD/S1A_IW_GRDH_1SSV_20160513T105352_20160513T105417_011239_011005_3043 |
| 24 |             | COPERNICUS/S1_GRD/S1B_IW_GRDH_1SSV_20161224T233451_20161224T233516_003544_006102_5C90 |             | COPERNICUS/S1_GRD/S1A_IW_GRDH_1SSV_20160606T105354_20160606T105419_011589_011B50_BA2A |
| 25 |             | COPERNICUS/S1_GRD/S1B_IW_GRDH_1SSV_20170117T233449_20170117T233514_003894_006B55_CD0A |             | COPERNICUS/S1_GRD/S1A_IW_GRDH_1SSV_20160630T105355_20160630T105420_011939_01265D_86CE |
| 26 |             | COPERNICUS/S1_GRD/S1B_IW_GRDH_1SSV_20170210T233448_20170210T233513_004244_0075C4_0CD3 |             | COPERNICUS/S1_GRD/S1A_IW_GRDH_1SSV_20160724T105356_20160724T105421_012289_0131C8_AEF8 |
| 27 |             | COPERNICUS/S1_GRD/S1B_IW_GRDH_1SSV_20170222T233448_20170222T233502_004419_007B0B_6826 | DVH/DVV     | COPERNICUS/S1_GRD/S1A_IW_GRDH_1SSV_20160817T105358_20160817T105423_012639_013D5D_68E8 |
| 28 |             | COPERNICUS/S1_GRD/S1B_IW_GRDH_1SSV_20170306T233448_20170306T233502_004594_008026_6468 |             | COPERNICUS/S1_GRD/S1A_IW_GRDH_1SDV_20160910T105358_20160910T105423_012989_0148EF_D90E |
| 29 |             | COPERNICUS/S1_GRD/S1B_IW_GRDH_1SSV_20170318T233448_20170318T233502_004769_00854D_C854 |             | COPERNICUS/S1_GRD/S1B_IW_GRDH_1SSV_20160928T105311_20160928T105336_002268_003D1D_58BD |
| 30 |             | COPERNICUS/S1_GRD/S1B_IW_GRDH_1SSV_20170330T233449_20170330T233503_004944_008A53_62BD |             | COPERNICUS/S1_GRD/S1B_IW_GRDH_1SSV_20161010T105311_20161010T105336_002443_0041FB_710D |
| 31 |             | COPERNICUS/S1_GRD/S1B_IW_GRDH_1SSV_20170411T233449_20170411T233503_005119_008F57_5C00 |             | COPERNICUS/S1_GRD/S1B_IW_GRDH_1SSV_20161103T105311_20161103T105336_002793_004BAC_98DE |
| 32 |             | COPERNICUS/S1_GRD/S1B_IW_GRDH_1SSV_20170423T233450_20170423T233504_005294_009467_0C88 |             | COPERNICUS/S1_GRD/S1B_IW_GRDH_1SSV_20161127T105311_20161127T105336_003143_005589_7168 |
| 33 |             | COPERNICUS/S1_GRD/S1B_IW_GRDH_1SSV_20170505T233450_20170505T233505_005469_009960_C5E6 |             | COPERNICUS/S1_GRD/S1B_IW_GRDH_1SDV_20161221T105310_20161221T105335_003493_005F89_2764 |
| 34 | AVV/AVH     | COPERNICUS/S1_GRD/S1B_IW_GRDH_1SDV_20170517T233451_20170517T233516_005644_009E2E_1192 |             | COPERNICUS/S1_GRD/S1B_IW_GRDH_1SDV_20170114T105308_20170114T105333_003843_0069C9_1AFF |
| 35 |             | COPERNICUS/S1_GRD/S1B_IW_GRDH_1SDV_20170529T233451_20170529T233516_005819_00A33B_41F1 |             | COPERNICUS/S1_GRD/S1B_IW_GRDH_1SDV_20170207T105307_20170207T105332_004193_007436_9A58 |
| 36 |             | COPERNICUS/S1_GRD/S1B_IW_GRDH_1SDV_20170610T233452_20170610T233517_005994_00A856_83E4 |             | COPERNICUS/S1_GRD/S1B_IW_GRDH_1SDV_20170303T105307_20170303T105332_004543_007E9F_2349 |

|    |                                                                                       |                                                                                       |
|----|---------------------------------------------------------------------------------------|---------------------------------------------------------------------------------------|
| 37 | COPERNICUS/S1_GRD/S1B_IW_GRDH_1SDV_20170622T233453_20170622T233518_006169_00AD71_EB9D | COPERNICUS/S1_GRD/S1B_IW_GRDH_1SDV_20170315T105307_20170315T105332_004718_0083C9_184B |
| 38 | COPERNICUS/S1_GRD/S1B_IW_GRDH_1SDV_20170704T233454_20170704T233519_006344_00B270_9F3C | COPERNICUS/S1_GRD/S1B_IW_GRDH_1SDV_20170327T105308_20170327T105333_004893_0088CB_C9BD |
| 39 | COPERNICUS/S1_GRD/S1B_IW_GRDH_1SDV_20170716T233455_20170716T233520_006519_00B770_46B2 | COPERNICUS/S1_GRD/S1B_IW_GRDH_1SDV_20170408T105308_20170408T105333_005068_008DD9_33E2 |
| 40 | COPERNICUS/S1_GRD/S1B_IW_GRDH_1SDV_20170728T233455_20170728T233520_006694_00BC6A_41A3 | COPERNICUS/S1_GRD/S1B_IW_GRDH_1SDV_20170420T105309_20170420T105334_005243_0092E6_D180 |
| 41 | COPERNICUS/S1_GRD/S1B_IW_GRDH_1SDV_20170809T233456_20170809T233521_006869_00C17B_16FE | COPERNICUS/S1_GRD/S1B_IW_GRDH_1SDV_20170502T105309_20170502T105334_005418_0097F6_8F6C |
| 42 | COPERNICUS/S1_GRD/S1B_IW_GRDH_1SDV_20170821T233456_20170821T233521_007044_00C691_E420 | COPERNICUS/S1_GRD/S1B_IW_GRDH_1SDV_20170514T105310_20170514T105335_005593_009CBD_ABA6 |
| 43 | COPERNICUS/S1_GRD/S1B_IW_GRDH_1SDV_20170914T233457_20170914T233522_007394_00D0C7_E73F | COPERNICUS/S1_GRD/S1B_IW_GRDH_1SDV_20170526T105312_20170526T105337_005768_00A1C0_5A7B |
| 44 | COPERNICUS/S1_GRD/S1B_IW_GRDH_1SDV_20170926T233458_20170926T233523_007569_00D5D3_51BF | COPERNICUS/S1_GRD/S1B_IW_GRDH_1SDV_20170607T105313_20170607T105338_005943_00A6D3_C75D |
| 45 | COPERNICUS/S1_GRD/S1B_IW_GRDH_1SDV_20171008T233458_20171008T233523_007744_00DAD9_B831 | COPERNICUS/S1_GRD/S1B_IW_GRDH_1SDV_20170619T105314_20170619T105339_006118_00ABF8_B5A7 |
| 46 | COPERNICUS/S1_GRD/S1B_IW_GRDH_1SDV_20171020T233458_20171020T233523_007919_00DFD3_1508 | COPERNICUS/S1_GRD/S1B_IW_GRDH_1SDV_20170701T105314_20170701T105339_006293_00B109_F969 |
| 47 | COPERNICUS/S1_GRD/S1B_IW_GRDH_1SDV_20171101T233458_20171101T233523_008094_00E4D9_3C74 | COPERNICUS/S1_GRD/S1B_IW_GRDH_1SDV_20170713T105315_20170713T105340_006468_00B5F8_A227 |
| 48 | COPERNICUS/S1_GRD/S1B_IW_GRDH_1SDV_20171113T233458_20171113T233523_008269_00EA0D_3BEA | COPERNICUS/S1_GRD/S1B_IW_GRDH_1SDV_20170725T105316_20170725T105341_006643_00BAF5_881B |
| 49 | COPERNICUS/S1_GRD/S1B_IW_GRDH_1SDV_20171125T233458_20171125T233523_008444_00EF60_C6B6 | COPERNICUS/S1_GRD/S1B_IW_GRDH_1SDV_20170806T105316_20170806T105341_006818_00C000_47C9 |
| 50 | COPERNICUS/S1_GRD/S1B_IW_GRDH_1SDV_20171207T233457_20171207T233522_008619_00F4EE_E424 | COPERNICUS/S1_GRD/S1B_IW_GRDH_1SDV_20170818T105317_20170818T105342_006993_00C51F_99C9 |
| 51 | COPERNICUS/S1_GRD/S1B_IW_GRDH_1SDV_20180112T233456_20180112T233521_009144_0105DE_CD6E | COPERNICUS/S1_GRD/S1B_IW_GRDH_1SDV_20170830T105317_20170830T105342_007168_00CA26_C451 |
| 52 | COPERNICUS/S1_GRD/S1B_IW_GRDH_1SDV_20180124T233455_20180124T233520_009319_010B95_6742 | COPERNICUS/S1_GRD/S1B_IW_GRDH_1SDV_20170911T105318_20170911T105343_007343_00CF4E_25A3 |
| 53 | COPERNICUS/S1_GRD/S1B_IW_GRDH_1SDV_20180205T233455_20180205T233520_009494_011151_B3AE | COPERNICUS/S1_GRD/S1B_IW_GRDH_1SDV_20170923T105318_20170923T105343_007518_00D460_7A6D |
| 54 | COPERNICUS/S1_GRD/S1B_IW_GRDH_1SDV_20180217T233455_20180217T233520_009669_011712_3B75 | COPERNICUS/S1_GRD/S1B_IW_GRDH_1SDV_20171005T105319_20171005T105344_007693_00D963_FAD2 |
| 55 | COPERNICUS/S1_GRD/S1B_IW_GRDH_1SDV_20180301T233455_20180301T233520_009844_011CDD_57FD | COPERNICUS/S1_GRD/S1B_IW_GRDH_1SDV_20171017T105319_20171017T105344_007868_00DE58_49A6 |
| 56 | COPERNICUS/S1_GRD/S1B_IW_GRDH_1SDV_20180313T233455_20180313T233520_010019_0122B4_A734 | COPERNICUS/S1_GRD/S1B_IW_GRDH_1SDV_20171029T105319_20171029T105344_008043_00E366_9165 |
| 57 | COPERNICUS/S1_GRD/S1B_IW_GRDH_1SDV_20180325T233455_20180325T233520_010194_012863_1ACB | COPERNICUS/S1_GRD/S1B_IW_GRDH_1SDV_20171110T105318_20171110T105343_008218_00E882_815C |
| 58 | COPERNICUS/S1_GRD/S1B_IW_GRDH_1SDV_20180406T233456_20180406T233521_010369_012E17_638B | COPERNICUS/S1_GRD/S1B_IW_GRDH_1SDV_20171122T105318_20171122T105343_008393_00EDD0_10A2 |
| 59 | COPERNICUS/S1_GRD/S1B_IW_GRDH_1SDV_20180418T233456_20180418T233521_010544_0133AB_AEDB | COPERNICUS/S1_GRD/S1B_IW_GRDH_1SDV_20171204T105318_20171204T105343_008568_00F359_3C10 |
| 60 | COPERNICUS/S1_GRD/S1B_IW_GRDH_1SDV_20180430T233457_20180430T233522_010719_013947_A24C | COPERNICUS/S1_GRD/S1B_IW_GRDH_1SDV_20171216T105318_20171216T105343_008743_00F8E8_2770 |
| 61 | COPERNICUS/S1_GRD/S1B_IW_GRDH_1SDV_20180512T233457_20180512T233522_010894_013EEF_8890 | COPERNICUS/S1_GRD/S1B_IW_GRDH_1SDV_20171228T105317_20171228T105342_008918_00FE83_3FC7 |
| 62 | COPERNICUS/S1_GRD/S1B_IW_GRDH_1SDV_20180524T233458_20180524T233523_011069_01449E_DFF3 | COPERNICUS/S1_GRD/S1B_IW_GRDH_1SDV_20180109T105317_20180109T105342_009093_010436_C774 |
| 63 | COPERNICUS/S1_GRD/S1B_IW_GRDH_1SDV_20180605T233458_20180605T233523_011244_014A37_5785 | COPERNICUS/S1_GRD/S1B_IW_GRDH_1SDV_20180121T105316_20180121T105341_009268_0109E9_090E |
| 64 | COPERNICUS/S1_GRD/S1B_IW_GRDH_1SDV_20180617T233459_20180617T233524_011419_014F97_0704 | COPERNICUS/S1_GRD/S1B_IW_GRDH_1SDV_20180202T105316_20180202T105341_009443_010FA2_2552 |
| 65 | COPERNICUS/S1_GRD/S1B_IW_GRDH_1SDV_20180711T233501_20180711T233526_011769_015A75_DD3D | COPERNICUS/S1_GRD/S1B_IW_GRDH_1SDV_20180214T105316_20180214T105341_009618_01156D_0C1F |
| 66 | COPERNICUS/S1_GRD/S1B_IW_GRDH_1SDV_20180723T233502_20180723T233527_011944_015FC8_0B66 | COPERNICUS/S1_GRD/S1B_IW_GRDH_1SDV_20180226T105316_20180226T105341_009793_011B34_E535 |
| 67 | COPERNICUS/S1_GRD/S1B_IW_GRDH_1SDV_20180804T233502_20180804T233527_012119_01650E_6E6E | COPERNICUS/S1_GRD/S1B_IW_GRDH_1SDV_20180310T105316_20180310T105341_009968_012112_D9A7 |
| 68 | COPERNICUS/S1_GRD/S1B_IW_GRDH_1SDV_20180816T233503_20180816T233528_012294_016A7A_A8F4 | COPERNICUS/S1_GRD/S1B_IW_GRDH_1SDV_20180403T105316_20180403T105341_010318_012C73_CE32 |
| 69 | COPERNICUS/S1_GRD/S1B_IW_GRDH_1SDV_20180828T233503_20180828T233528_012469_016FED_0E80 | COPERNICUS/S1_GRD/S1B_IW_GRDH_1SDV_20180415T105316_20180415T105341_010493_01320F_7672 |
| 70 | COPERNICUS/S1_GRD/S1B_IW_GRDH_1SDV_20180909T233504_20180909T233529_012644_017551_288E | COPERNICUS/S1_GRD/S1B_IW_GRDH_1SDV_20180427T105317_20180427T105342_010668_0137A7_D2BD |
| 71 | COPERNICUS/S1_GRD/S1B_IW_GRDH_1SDV_20180921T233504_20180921T233529_012819_017AAA_3015 | COPERNICUS/S1_GRD/S1B_IW_GRDH_1SDV_20180509T105317_20180509T105342_010843_013D51_1CCB |
| 72 | COPERNICUS/S1_GRD/S1B_IW_GRDH_1SDV_20181003T233505_20181003T233530_012994_018004_0B97 | COPERNICUS/S1_GRD/S1B_IW_GRDH_1SDV_20180521T105318_20180521T105343_011018_0142FA_A11F |
| 73 | COPERNICUS/S1_GRD/S1B_IW_GRDH_1SDV_20181027T233449_20181027T233514_013344_018ACE_7CDC | COPERNICUS/S1_GRD/S1B_IW_GRDH_1SDV_20180602T105319_20180602T105344_011193_0148A4_6043 |
| 74 | COPERNICUS/S1_GRD/S1B_IW_GRDH_1SDV_20181108T233449_20181108T233514_013519_019048_F699 | COPERNICUS/S1_GRD/S1B_IW_GRDH_1SDV_20180614T105320_20180614T105345_011368_014E09_C62D |
| 75 | COPERNICUS/S1_GRD/S1B_IW_GRDH_1SDV_20181120T233449_20181120T233514_013694_0195D2_B535 | COPERNICUS/S1_GRD/S1B_IW_GRDH_1SDV_20180626T105320_20180626T105345_011543_015373_E87A |
| 76 | COPERNICUS/S1_GRD/S1B_IW_GRDH_1SDV_20181202T233448_20181202T233513_013869_019B6C_7E30 | COPERNICUS/S1_GRD/S1B_IW_GRDH_1SDV_20180708T105321_20180708T105346_011718_0158E4_C850 |

|     |                                                                                       |                                                                                       |
|-----|---------------------------------------------------------------------------------------|---------------------------------------------------------------------------------------|
| 77  | COPERNICUS/S1_GRD/S1B_IW_GRDH_1SDV_20181214T233448_20181214T233513_014044_01A121_D824 | COPERNICUS/S1_GRD/S1B_IW_GRDH_1SDV_20180720T105322_20180720T105347_011893_015E41_31E5 |
| 78  | COPERNICUS/S1_GRD/S1B_IW_GRDH_1SDV_20181226T233447_20181226T233512_014219_01A6F0_3B90 | COPERNICUS/S1_GRD/S1B_IW_GRDH_1SDV_20180801T105323_20180801T105348_012068_01638A_CD2C |
| 79  | COPERNICUS/S1_GRD/S1B_IW_GRDH_1SDV_20190107T233447_20190107T233512_014394_01ACA7_552C | COPERNICUS/S1_GRD/S1B_IW_GRDH_1SDV_20180813T105323_20180813T105348_012243_0168EF_7E6E |
| 80  | COPERNICUS/S1_GRD/S1B_IW_GRDH_1SDV_20190119T233447_20190119T233512_014569_01B247_6005 | COPERNICUS/S1_GRD/S1B_IW_GRDH_1SDV_20180825T105324_20180825T105349_012418_016E5A_0B22 |
| 81  | COPERNICUS/S1_GRD/S1B_IW_GRDH_1SDV_20190131T233446_20190131T233511_014744_01B7E5_8160 | COPERNICUS/S1_GRD/S1B_IW_GRDH_1SDV_20180906T105325_20180906T105350_012593_0173C2_2CE8 |
| 82  | COPERNICUS/S1_GRD/S1B_IW_GRDH_1SDV_20190224T233446_20190224T233511_015094_01C363_3279 | COPERNICUS/S1_GRD/S1B_IW_GRDH_1SDV_20180918T105325_20180918T105350_012768_01791F_FA88 |
| 83  | COPERNICUS/S1_GRD/S1B_IW_GRDH_1SDV_20190308T233446_20190308T233511_015269_01C928_2CC6 | COPERNICUS/S1_GRD/S1B_IW_GRDH_1SDV_20180930T105325_20180930T105350_012943_017E7D_E39C |
| 84  | COPERNICUS/S1_GRD/S1B_IW_GRDH_1SDV_20190320T233446_20190320T233511_015444_01CED5_3162 | COPERNICUS/S1_GRD/S1B_IW_GRDH_1SDV_20181012T105326_20181012T105351_013118_0183CD_8D43 |
| 85  | COPERNICUS/S1_GRD/S1B_IW_GRDH_1SDV_20190401T233446_20190401T233511_015619_01D493_1A9E | COPERNICUS/S1_GRD/S1B_IW_GRDH_1SDV_20181105T105325_20181105T105350_013468_018EB7_3E8A |
| 86  | COPERNICUS/S1_GRD/S1B_IW_GRDH_1SDV_20190413T233446_20190413T233511_015794_01DA64_8E5B | COPERNICUS/S1_GRD/S1B_IW_GRDH_1SDV_20181117T105325_20181117T105350_013643_019433_521A |
| 87  | COPERNICUS/S1_GRD/S1B_IW_GRDH_1SDV_20190425T233447_20190425T233512_015969_01E02B_E020 | COPERNICUS/S1_GRD/S1B_IW_GRDH_1SDV_20181129T105325_20181129T105350_013818_0199CB_39A2 |
| 88  | COPERNICUS/S1_GRD/S1B_IW_GRDH_1SDV_20190507T233447_20190507T233512_016144_01E601_C0CB | COPERNICUS/S1_GRD/S1B_IW_GRDH_1SDV_20181211T105324_20181211T105349_013993_019F75_67B7 |
| 89  | COPERNICUS/S1_GRD/S1B_IW_GRDH_1SDV_20190519T233448_20190519T233513_016319_01EB69_3AB2 | COPERNICUS/S1_GRD/S1B_IW_GRDH_1SDV_20181223T105324_20181223T105349_014168_01A542_7F03 |
| 90  | COPERNICUS/S1_GRD/S1B_IW_GRDH_1SDV_20190531T233450_20190531T233515_016494_01F0BD_4292 | COPERNICUS/S1_GRD/S1B_IW_GRDH_1SDV_20190104T105324_20190104T105349_014343_01AB02_ABB8 |
| 91  | COPERNICUS/S1_GRD/S1A_IW_GRDH_1SDV_20190606T233554_20190606T233625_027565_031C58_8919 | COPERNICUS/S1_GRD/S1B_IW_GRDH_1SDV_20190116T105323_20190116T105348_014518_01B0AC_76D3 |
| 92  | COPERNICUS/S1_GRD/S1B_IW_GRDH_1SDV_20190612T233449_20190612T233514_016669_01F5F3_E6E5 | COPERNICUS/S1_GRD/S1B_IW_GRDH_1SDV_20190128T105323_20190128T105348_014693_01B641_4E7C |
| 93  | COPERNICUS/S1_GRD/S1B_IW_GRDH_1SDV_20190706T233451_20190706T233516_017019_02004D_5D07 | COPERNICUS/S1_GRD/S1B_IW_GRDH_1SDV_20190209T105322_20190209T105347_014868_01BC03_9FE5 |
| 94  | COPERNICUS/S1_GRD/S1B_IW_GRDH_1SDV_20190823T233454_20190823T233519_017719_021566_1438 | COPERNICUS/S1_GRD/S1B_IW_GRDH_1SDV_20190221T105322_20190221T105347_015043_01C1C0_13C1 |
| 95  | COPERNICUS/S1_GRD/S1B_IW_GRDH_1SDV_20190904T233454_20190904T233519_017894_021AD1_ECB4 | COPERNICUS/S1_GRD/S1B_IW_GRDH_1SDV_20190305T105322_20190305T105347_015218_01C785_62B7 |
| 96  | COPERNICUS/S1_GRD/S1B_IW_GRDH_1SDV_20190916T233455_20190916T233520_018069_022045_23F3 | COPERNICUS/S1_GRD/S1B_IW_GRDH_1SDV_20190317T105322_20190317T105347_015393_01CD2F_4116 |
| 97  | COPERNICUS/S1_GRD/S1B_IW_GRDH_1SDV_20190928T233455_20190928T233520_018244_0225A7_81FE | COPERNICUS/S1_GRD/S1B_IW_GRDH_1SDV_20190329T105322_20190329T105347_015568_01D2E4_B388 |
| 98  | COPERNICUS/S1_GRD/S1B_IW_GRDH_1SDV_20191010T233455_20191010T233520_018419_022B26_345D | COPERNICUS/S1_GRD/S1B_IW_GRDH_1SDV_20190410T105323_20190410T105348_015743_01D8B7_F258 |
| 99  | COPERNICUS/S1_GRD/S1B_IW_GRDH_1SDV_20191022T233455_20191022T233520_018594_023085_9D3D | COPERNICUS/S1_GRD/S1B_IW_GRDH_1SDV_20190422T105323_20190422T105348_015918_01DE80_1A5B |
| 100 | COPERNICUS/S1_GRD/S1B_IW_GRDH_1SDV_20191103T233455_20191103T233520_018769_02360B_541F | COPERNICUS/S1_GRD/S1B_IW_GRDH_1SDV_20190504T105324_20190504T105349_016093_01E45B_828F |
| 101 | COPERNICUS/S1_GRD/S1B_IW_GRDH_1SDV_20191115T233455_20191115T233520_018944_023BBE_85B3 | COPERNICUS/S1_GRD/S1B_IW_GRDH_1SDV_20190516T105324_20190516T105349_016268_01E9DF_A980 |
| 102 | COPERNICUS/S1_GRD/S1B_IW_GRDH_1SDV_20191127T233455_20191127T233520_019119_024158_8F8B | COPERNICUS/S1_GRD/S1B_IW_GRDH_1SDV_20190528T105325_20190528T105350_016443_01EF3E_2AAC |
| 103 | COPERNICUS/S1_GRD/S1B_IW_GRDH_1SDV_20191209T233454_20191209T233519_019294_0246E1_51F6 | COPERNICUS/S1_GRD/S1A_IW_GRDH_1SDV_20190603T105408_20190603T105433_027514_031AD0_A62A |
| 104 | COPERNICUS/S1_GRD/S1B_IW_GRDH_1SDV_20191221T233454_20191221T233519_019469_024C73_0CDB | COPERNICUS/S1_GRD/S1B_IW_GRDH_1SDV_20190609T105326_20190609T105351_016618_01F475_25DD |
| 105 | COPERNICUS/S1_GRD/S1B_IW_GRDH_1SDV_20200102T233453_20200102T233518_019644_025203_6C7F | COPERNICUS/S1_GRD/S1B_IW_GRDH_1SDV_20190621T105326_20190621T105351_016793_01F9AB_B146 |
| 106 | COPERNICUS/S1_GRD/S1B_IW_GRDH_1SDV_20200114T233453_20200114T233518_019819_025798_D981 | COPERNICUS/S1_GRD/S1B_IW_GRDH_1SDV_20190703T105327_20190703T105352_016968_01FED6_7B1F |
| 107 | COPERNICUS/S1_GRD/S1B_IW_GRDH_1SDV_20200126T233452_20200126T233517_019994_025D2F_8097 | COPERNICUS/S1_GRD/S1B_IW_GRDH_1SDV_20190715T105328_20190715T105353_017143_020400_FAF6 |
| 108 | COPERNICUS/S1_GRD/S1B_IW_GRDH_1SDV_20200207T233452_20200207T233517_020169_0262E0_949B | COPERNICUS/S1_GRD/S1B_IW_GRDH_1SDV_20190727T105328_20190727T105353_017318_020916_46BF |
| 109 | COPERNICUS/S1_GRD/S1B_IW_GRDH_1SDV_20200219T233452_20200219T233517_020344_02687D_B981 | COPERNICUS/S1_GRD/S1B_IW_GRDH_1SDV_20190808T105329_20190808T105354_017493_020E5D_B530 |
| 110 | COPERNICUS/S1_GRD/S1B_IW_GRDH_1SDV_20200302T233452_20200302T233517_020519_026E1D_61CC | COPERNICUS/S1_GRD/S1B_IW_GRDH_1SDV_20190820T105330_20190820T105355_017668_0213D5_D575 |
| 111 | COPERNICUS/S1_GRD/S1B_IW_GRDH_1SDV_20200314T233452_20200314T233517_020694_0273A9_C649 | COPERNICUS/S1_GRD/S1B_IW_GRDH_1SDV_20190901T105331_20190901T105356_017843_021944_2F1F |
| 112 | COPERNICUS/S1_GRD/S1B_IW_GRDH_1SDV_20200326T233452_20200326T233517_020869_02792B_4F84 | COPERNICUS/S1_GRD/S1B_IW_GRDH_1SDV_20190913T105331_20190913T105356_018018_021EBB_EEB8 |
| 113 | COPERNICUS/S1_GRD/S1B_IW_GRDH_1SDV_20200407T233452_20200407T233517_021044_027EBA_566F | COPERNICUS/S1_GRD/S1B_IW_GRDH_1SDV_20190925T105332_20190925T105357_018193_02241F_1F75 |
| 114 | COPERNICUS/S1_GRD/S1B_IW_GRDH_1SDV_20200419T233453_20200419T233518_021219_02843E_1F95 | COPERNICUS/S1_GRD/S1B_IW_GRDH_1SDV_20191007T105332_20191007T105357_018368_0229A7_9DD3 |
| 115 | COPERNICUS/S1_GRD/S1B_IW_GRDH_1SDV_20200501T233454_20200501T233519_021394_0289C8_14E5 | COPERNICUS/S1_GRD/S1B_IW_GRDH_1SDV_20191019T105332_20191019T105357_018543_022F07_2684 |
| 116 | COPERNICUS/S1_GRD/S1B_IW_GRDH_1SDV_20200513T233454_20200513T233519_021569_028F33_341E | COPERNICUS/S1_GRD/S1B_IW_GRDH_1SDV_20191031T105332_20191031T105357_018718_02347D_4086 |

|     |                                                                                        |
|-----|----------------------------------------------------------------------------------------|
| 117 | COPERNICUS/S1_GRD/S1B_IW_GRDH_1SDV_20200525T233455_20200525T233520_021744_029451_B18B  |
| 118 | COPERNICUS/S1_GRD/S1B_IW_GRDH_1SDV_20200606T233456_20200606T233521_021919_029993_5E35  |
| 119 | COPERNICUS/S1_GRD/S1B_IW_GRDH_1SDV_20200618T233456_20200618T233521_022094_029EDF_D4F9  |
| 120 | COPERNICUS/S1_GRD/S1B_IW_GRDH_1SDV_20200630T233457_20200630T233522_022269_02A442_F323  |
| 121 | COPERNICUS/S1_GRD/S1B_IW_GRDH_1SDV_20200712T233458_20200712T233523_022444_02A991_D9C0  |
| 122 | COPERNICUS/S1_GRD/S1B_IW_GRDH_1SDV_20200724T233458_20200724T233523_022619_02AEDE_6F91  |
| 123 | COPERNICUS/S1_GRD/S1B_IW_GRDH_1SDV_20200805T233459_20200805T233524_022794_02B431_9BE8  |
| 124 | COPERNICUS/S1_GRD/S1B_IW_GRDH_1SDV_20200817T233500_20200817T233525_022969_02B99B_742B  |
| 125 | COPERNICUS/S1_GRD/S1B_IW_GRDH_1SDV_20200829T233500_20200829T233525_023144_02BF1C_E1CF  |
| 126 | COPERNICUS/S1_GRD/S1B_IW_GRDH_1SDV_20200910T233501_20200910T233526_023319_02C495_95B2  |
| 127 | COPERNICUS/S1_GRD/S1B_IW_GRDH_1SDV_20200922T233501_20200922T233526_023494_02CA12_21A1  |
| 128 | COPERNICUS/S1_GRD/S1B_IW_GRDH_1SDV_20201004T233501_20201004T233526_023669_02CF90_B66B  |
| 129 | COPERNICUS/S1_GRD/S1B_IW_GRDH_1SDV_20201016T233502_20201016T233527_023844_02D4F9_4A83  |
| 130 | COPERNICUS/S1_GRD/S1B_IW_GRDH_1SDV_20201028T233502_20201028T233527_024019_02DA7C_3D8F  |
| 131 | COPERNICUS/S1_GRD/S1B_IW_GRDH_1SDV_20201109T233501_20201109T233526_024194_02DFE1_CF53  |
| 132 | COPERNICUS/S1_GRD/S1B_IW_GRDH_1SDV_20201121T233501_20201121T233526_024369_02E56A_F936  |
| 133 | COPERNICUS/S1_GRD/S1B_IW_GRDH_1SDV_20201203T233501_20201203T233526_024544_02EAF2_CEB A |
| 134 | COPERNICUS/S1_GRD/S1B_IW_GRDH_1SDV_20201215T233500_20201215T233525_024719_02F0A4_BF61  |
| 135 | COPERNICUS/S1_GRD/S1B_IW_GRDH_1SDV_20201227T233500_20201227T233525_024894_02F64E_91F1  |
| 136 | COPERNICUS/S1_GRD/S1B_IW_GRDH_1SDV_20210108T233459_20210108T233524_025069_02FBE6_C946  |
| 137 | COPERNICUS/S1_GRD/S1B_IW_GRDH_1SDV_20210120T233459_20210120T233524_025244_030180_C71E  |
| 138 |                                                                                        |
| 139 |                                                                                        |
| 140 |                                                                                        |
| 141 |                                                                                        |
| 142 |                                                                                        |
| 143 |                                                                                        |
| 144 |                                                                                        |
| 145 |                                                                                        |
| 146 |                                                                                        |
| 147 |                                                                                        |
| 148 |                                                                                        |
| 149 |                                                                                        |
| 150 |                                                                                        |
| 151 |                                                                                        |
| 152 |                                                                                        |
| 153 |                                                                                        |

|                                                                                       |
|---------------------------------------------------------------------------------------|
| COPERNICUS/S1_GRD/S1B_IW_GRDH_1SDV_20191112T105332_20191112T105357_018893_023A24_A6C6 |
| COPERNICUS/S1_GRD/S1B_IW_GRDH_1SDV_20191124T105332_20191124T105357_019068_023FC3_DB83 |
| COPERNICUS/S1_GRD/S1B_IW_GRDH_1SDV_20191206T105331_20191206T105356_019243_024550_8B08 |
| COPERNICUS/S1_GRD/S1B_IW_GRDH_1SDV_20191218T105331_20191218T105356_019418_024AE7_6EE5 |
| COPERNICUS/S1_GRD/S1B_IW_GRDH_1SDV_20191230T105330_20191230T105355_019593_025075_B26C |
| COPERNICUS/S1_GRD/S1B_IW_GRDH_1SDV_20200111T105330_20200111T105355_019768_025607_1B5E |
| COPERNICUS/S1_GRD/S1B_IW_GRDH_1SDV_20200123T105329_20200123T105354_019943_025B99_DF3F |
| COPERNICUS/S1_GRD/S1B_IW_GRDH_1SDV_20200204T105329_20200204T105354_020118_026145_90CE |
| COPERNICUS/S1_GRD/S1B_IW_GRDH_1SDV_20200216T105329_20200216T105354_020293_0266E6_AB2E |
| COPERNICUS/S1_GRD/S1B_IW_GRDH_1SDV_20200228T105328_20200228T105353_020468_026C83_6DCA |
| COPERNICUS/S1_GRD/S1B_IW_GRDH_1SDV_20200311T105328_20200311T105353_020643_027215_F76D |
| COPERNICUS/S1_GRD/S1B_IW_GRDH_1SDV_20200323T105329_20200323T105354_020818_02779B_AACC |
| COPERNICUS/S1_GRD/S1B_IW_GRDH_1SDV_20200404T105329_20200404T105354_020993_027D27_62E8 |
| COPERNICUS/S1_GRD/S1B_IW_GRDH_1SDV_20200416T105329_20200416T105354_021168_0282B1_A6B3 |
| COPERNICUS/S1_GRD/S1B_IW_GRDH_1SDV_20200428T105330_20200428T105355_021343_028835_06DE |
| COPERNICUS/S1_GRD/S1B_IW_GRDH_1SDV_20200510T105330_20200510T105355_021518_028DB2_4C39 |
| COPERNICUS/S1_GRD/S1B_IW_GRDH_1SDV_20200522T105331_20200522T105356_021693_029D26_DC37 |
| COPERNICUS/S1_GRD/S1B_IW_GRDH_1SDV_20200603T105332_20200603T105357_021868_029818_77AA |
| COPERNICUS/S1_GRD/S1B_IW_GRDH_1SDV_20200615T105333_20200615T105358_022043_029D5A_8126 |
| COPERNICUS/S1_GRD/S1B_IW_GRDH_1SDV_20200627T105333_20200627T105358_022218_02A2B0_755A |
| COPERNICUS/S1_GRD/S1B_IW_GRDH_1SDV_20200709T105334_20200709T105359_022393_02A805_59E6 |
| COPERNICUS/S1_GRD/S1B_IW_GRDH_1SDV_20200721T105335_20200721T105400_022568_02AD57_3C1B |
| COPERNICUS/S1_GRD/S1B_IW_GRDH_1SDV_20200802T105335_20200802T105400_022743_02B2A3_1A15 |
| COPERNICUS/S1_GRD/S1B_IW_GRDH_1SDV_20200814T105336_20200814T105401_022918_02B80A_A58E |
| COPERNICUS/S1_GRD/S1B_IW_GRDH_1SDV_20200826T105337_20200826T105402_023093_02BD8E_1697 |
| COPERNICUS/S1_GRD/S1B_IW_GRDH_1SDV_20200907T105337_20200907T105402_023268_02C303_372C |
| COPERNICUS/S1_GRD/S1B_IW_GRDH_1SDV_20200919T105338_20200919T105403_023443_02C87D_5070 |
| COPERNICUS/S1_GRD/S1B_IW_GRDH_1SDV_20201001T105338_20201001T105403_023618_02CDFC_3887 |
| COPERNICUS/S1_GRD/S1B_IW_GRDH_1SDV_20201013T105338_20201013T105403_023793_02D36B_FE0B |
| COPERNICUS/S1_GRD/S1B_IW_GRDH_1SDV_20201025T105338_20201025T105403_023968_02D8E8_785C |
| COPERNICUS/S1_GRD/S1B_IW_GRDH_1SDV_20201106T105338_20201106T105403_024143_02DE4E_18C7 |
| COPERNICUS/S1_GRD/S1B_IW_GRDH_1SDV_20201118T105338_20201118T105403_024318_02E3D0_48BA |
| COPERNICUS/S1_GRD/S1B_IW_GRDH_1SDV_20201130T105338_20201130T105403_024493_02E95B_D791 |
| COPERNICUS/S1_GRD/S1B_IW_GRDH_1SDV_20201212T105337_20201212T105402_024668_02EF02_19FD |
| COPERNICUS/S1_GRD/S1B_IW_GRDH_1SDV_20201224T105336_20201224T105401_024843_02F4B0_013F |
| COPERNICUS/S1_GRD/S1B_IW_GRDH_1SDV_20210117T105335_20210117T105400_025193_02FFE6_EF1E |
| COPERNICUS/S1_GRD/S1B_IW_GRDH_1SDV_20210129T105335_20210129T105400_025368_03057C_A521 |
